# Supplementary material
Source: HighWire-hosted journal article supplement (https://rmdopen.bmj.com/content/8/2/e001983)
Supplement: inline-supplementary-material-3 [file inline-supplementary-material-3.pdf]

**Table 3: In vitro effect of pollutants on human chondrocyte.**

| Author and year of publication | Type of chondrocyte                                                           | Type of pollutant<br>Duration of incubation              | evaluation                                                                            | Main Results                                                                                                                                                                                                                                                                                                                                               |
|--------------------------------|-------------------------------------------------------------------------------|----------------------------------------------------------|---------------------------------------------------------------------------------------|------------------------------------------------------------------------------------------------------------------------------------------------------------------------------------------------------------------------------------------------------------------------------------------------------------------------------------------------------------|
| Pascarelli 2013 <sup>33</sup>  | Cultured OA chondrocyte<br>From femoral heads of 6 OA patients (arthroplasty) | Gold and silver nanoparticles<br>Incubation for 24 hours | Cell viability, inducible NO synthase expression                                      | <p>Cell viability : Significant dose-dependent toxic effect</p> <p>Gold : r = - 0.89</p> <p>Silver : r = - 0.96</p> <p>P&lt;0.001</p> <p>Survival cells for concentration of 250 µM : silver 10%, gold 30%, control 80%</p> <p>Increased presence of inducible NO synthase expression</p> <p>Increased expression of MMP1, MMP3, MMP13, ADAMTS 4 and 5</p> |
| Abella 2015 <sup>34</sup>      | Cultured immortalized human juvenile costal chondrocyte                       | Non-dioxin PCB<br>Incubation for 24 and 48 hours         | Cell viability (MTT), LDH, p38MAPK, Bax, Bcl2, caspase 3, MDA, oxidative stress index | <p>Strong reduction of cell viability in a concentration dependent manner</p> <p>Survival cells for concentration of 10µM : 50-75% according to PCB subtypes after 24h incubation; 37-63% after 48h</p> <p>Necrosis : LDH augmentation</p>                                                                                                                 |

|                         |                                                                                             |                                          |                                                 |       |                                                                                                                                                                                                                                                                                                                                                              |
|-------------------------|---------------------------------------------------------------------------------------------|------------------------------------------|-------------------------------------------------|-------|--------------------------------------------------------------------------------------------------------------------------------------------------------------------------------------------------------------------------------------------------------------------------------------------------------------------------------------------------------------|
|                         |                                                                                             |                                          |                                                 |       | Apoptosis : p38MAPK phosphorylation, decreased expression of Bax and Bcl2, caspase 3 activation                                                                                                                                                                                                                                                              |
|                         |                                                                                             |                                          |                                                 |       | Oxidative stress : Increased oxidative stress index and MDA levels                                                                                                                                                                                                                                                                                           |
| Wang 2010 <sup>24</sup> | -Cultured OA chondrocyte from knee OA (arthroplasty),<br><br>- cultured chondrosarcoma cell | BPA                                      | Cell viability, inducible synthase expression   | NO    | - on OA chondrocyte : little effect on NO production and no effect on cell viability<br><br>- on human chondrocyte : reversed the effect of estrogen on suppressing IL1 $\beta$ dependent MMP1 and NF-KB expression<br><br>- on chondrosarcoma cells : reduces NO production and cell viability<br><br>Survival cells for concentration of 100 $\mu$ M : 30% |
| Peng 1992 <sup>35</sup> | Cultured human embryonic chondrocyte                                                        | Fluvic acid<br><br>Incubation for 7 days | Morphology of cell, peroxidation, free radicals | lipid | Deformation of cell (fragmental, protuberances...) Increased lipid peroxidation                                                                                                                                                                                                                                                                              |

OA: osteoarthritis, PCB: polychlorinated biphenyls, MTT: methyl-thiazolyl-tetrazolium, LDH: lactate dehydrogenase, MDA: malondialdehyde, NO: nitric oxide, BPA: bisphenol A, IL1 $\beta$ : interleukine 1 beta, MMP: matrix mettaloproteinase, Bax: Bcl2 associated x protein, Bcl2: B cell lymphoma 2, MAPK: Mitogen-activated protein kinases.
